# Supplementary material
Source: PubMed Central journal article supplement (PMC7126329)
Supplement: mmc4.pdf [file mmc4.pdf]

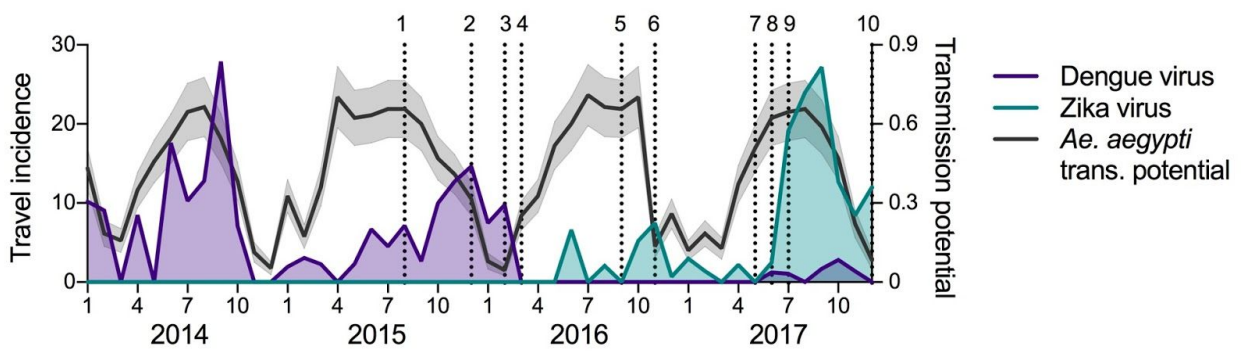

| #  | Date       | Highlights                                                                                                                                          | Reference                                                                                                                                                                                                                                       |
|----|------------|-----------------------------------------------------------------------------------------------------------------------------------------------------|-------------------------------------------------------------------------------------------------------------------------------------------------------------------------------------------------------------------------------------------------|
| 1  | 2015.08.07 | <ul style="list-style-type: none"> <li>• Cuba reports high <i>Aedes aegypti</i> populations</li> </ul>                                              | <a href="https://havanatimes.org/?p=113113">https://havanatimes.org/?p=113113</a>                                                                                                                                                               |
| 2  | 2015.12.01 | <ul style="list-style-type: none"> <li>• Cuba issues Zika epidemiological alert detailing surveillance, prevention, and control measures</li> </ul> | <a href="https://scielosp.org/scielo.php?pid=S1555-79602016000100006&amp;script=sci_arttext&amp;tlng=pt">https://scielosp.org/scielo.php?pid=S1555-79602016000100006&amp;script=sci_arttext&amp;tlng=pt</a>                                     |
| 3  | 2016.02.22 | <ul style="list-style-type: none"> <li>• Cuba mobilizes 9,000 armed forces reserves and active members for mosquito fumigation</li> </ul>           | <a href="https://www.reuters.com/article/us-health-zika-cuba-idUSKCN0VV1EW">https://www.reuters.com/article/us-health-zika-cuba-idUSKCN0VV1EW</a>                                                                                               |
| 4  | 2016.03.16 | <ul style="list-style-type: none"> <li>• First autochthonous case diagnosed in Cuba</li> </ul>                                                      | <a href="https://scielosp.org/scielo.php?pid=S1555-79602016000100006&amp;script=sci_arttext&amp;tlng=pt">https://scielosp.org/scielo.php?pid=S1555-79602016000100006&amp;script=sci_arttext&amp;tlng=pt</a>                                     |
| 5  | 2016.09.28 | <ul style="list-style-type: none"> <li>• No Zika cases reported since March</li> <li>• Dengue nearly eliminated</li> </ul>                          | <a href="https://www.reuters.com/article/us-health-zika-cuba-idUSKCN0ZE1TG">https://www.reuters.com/article/us-health-zika-cuba-idUSKCN0ZE1TG</a>                                                                                               |
| 6  | 2016.11.08 | <ul style="list-style-type: none"> <li>• Zika outbreaks causing local transmission have occurred in Havana and two other cities</li> </ul>          | <a href="https://www.statnews.com/2016/11/08/zika-in-cuba/">https://www.statnews.com/2016/11/08/zika-in-cuba/</a>                                                                                                                               |
| 7  | 2017.04.18 | <ul style="list-style-type: none"> <li>• Zika cases spike around 1900 local cases</li> </ul>                                                        | <a href="https://in.reuters.com/article/us-health-zika-cuba/cuba-says-zika-tally-rises-to-nearly-1900-cases-idINKCN18E25G">https://in.reuters.com/article/us-health-zika-cuba/cuba-says-zika-tally-rises-to-nearly-1900-cases-idINKCN18E25G</a> |
| 8  | 2017.06.03 | <ul style="list-style-type: none"> <li>• Reported increase <i>Aedes aegypti</i> populations in Cuba</li> </ul>                                      | <a href="https://www.telesureenglish.net/news/Cuba-Fights-Rising-Dengue-Zika-Infestations-20170603-0015.html">https://www.telesureenglish.net/news/Cuba-Fights-Rising-Dengue-Zika-Infestations-20170603-0015.html</a>                           |
| 9  | 2017.07.11 | <ul style="list-style-type: none"> <li>• Mosquito control program extended until late July</li> </ul>                                               | <a href="https://www.cubanet.org/mas-noticias/se-agrava-la-situacion-epidemiologica-en-holguin/">https://www.cubanet.org/mas-noticias/se-agrava-la-situacion-epidemiologica-en-holguin/</a>                                                     |
| 10 | 2017.12.26 | <ul style="list-style-type: none"> <li>• Zika transmission reported in 18 municipalities</li> <li>• Continued decline in Zika cases</li> </ul>      | <a href="http://en.escambray.cu/2017/cuba-reports-lowest-infant-mortality-rate-ever/">http://en.escambray.cu/2017/cuba-reports-lowest-infant-mortality-rate-ever/</a>                                                                           |
